# Supplementary material
Source: PubMed Central journal article supplement (PMC11105601)
Supplement: 18_2019_3123_MOESM1_ESM.pdf [file 18_2019_3123_MOESM1_ESM.pdf]

**Figure S1**

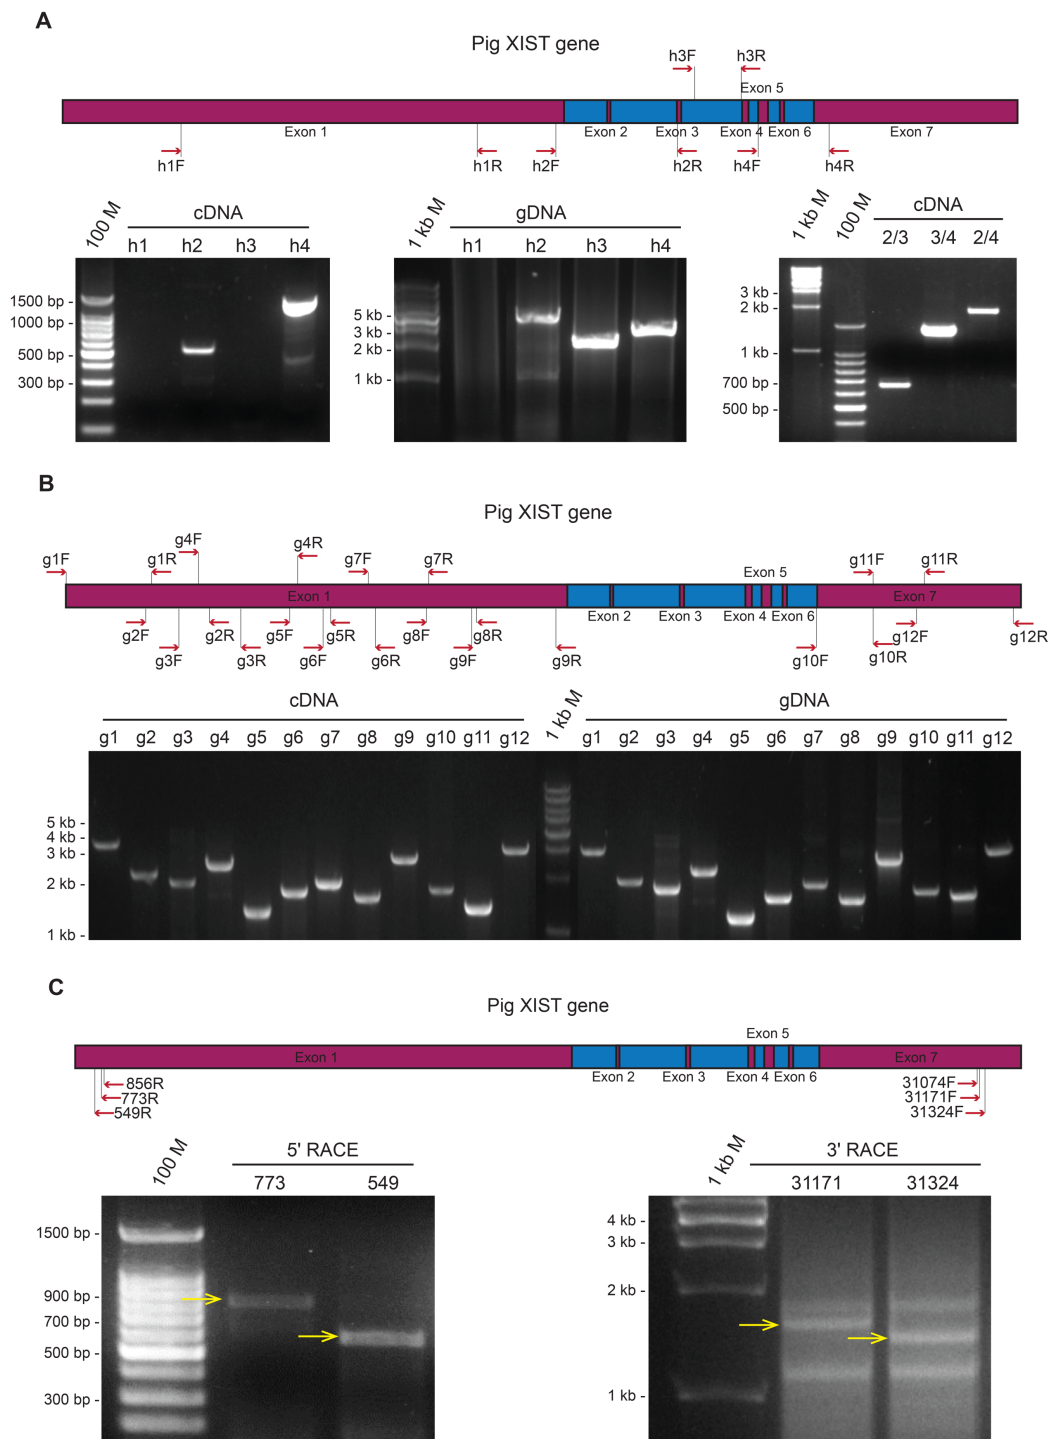

Figure S1 Identification of the full-length RNA sequence of porcine *XIST*.

(A) PCR products of homologous regions amplified in porcine cDNA and genome. Red arrowheads indicate the primer positions. (B) PCR products of overlapped overlapping primers amplified in porcine cDNA and genome. Red arrowheads indicate the primer positions. (C) Identification of the transcriptional start site and transcriptional stop site of porcine *XIST* using 5'-RACE and 3'-RACE respectively. To avoid interruptions of undesirable nonspecific bands, we designed two reverse primers at different positions. Therefore, the sizes of correct bands is dependent on the different primer positions. Yellow arrowheads indicate the correct bands. Red arrowheads indicate the primer positions.

**Figure S2**

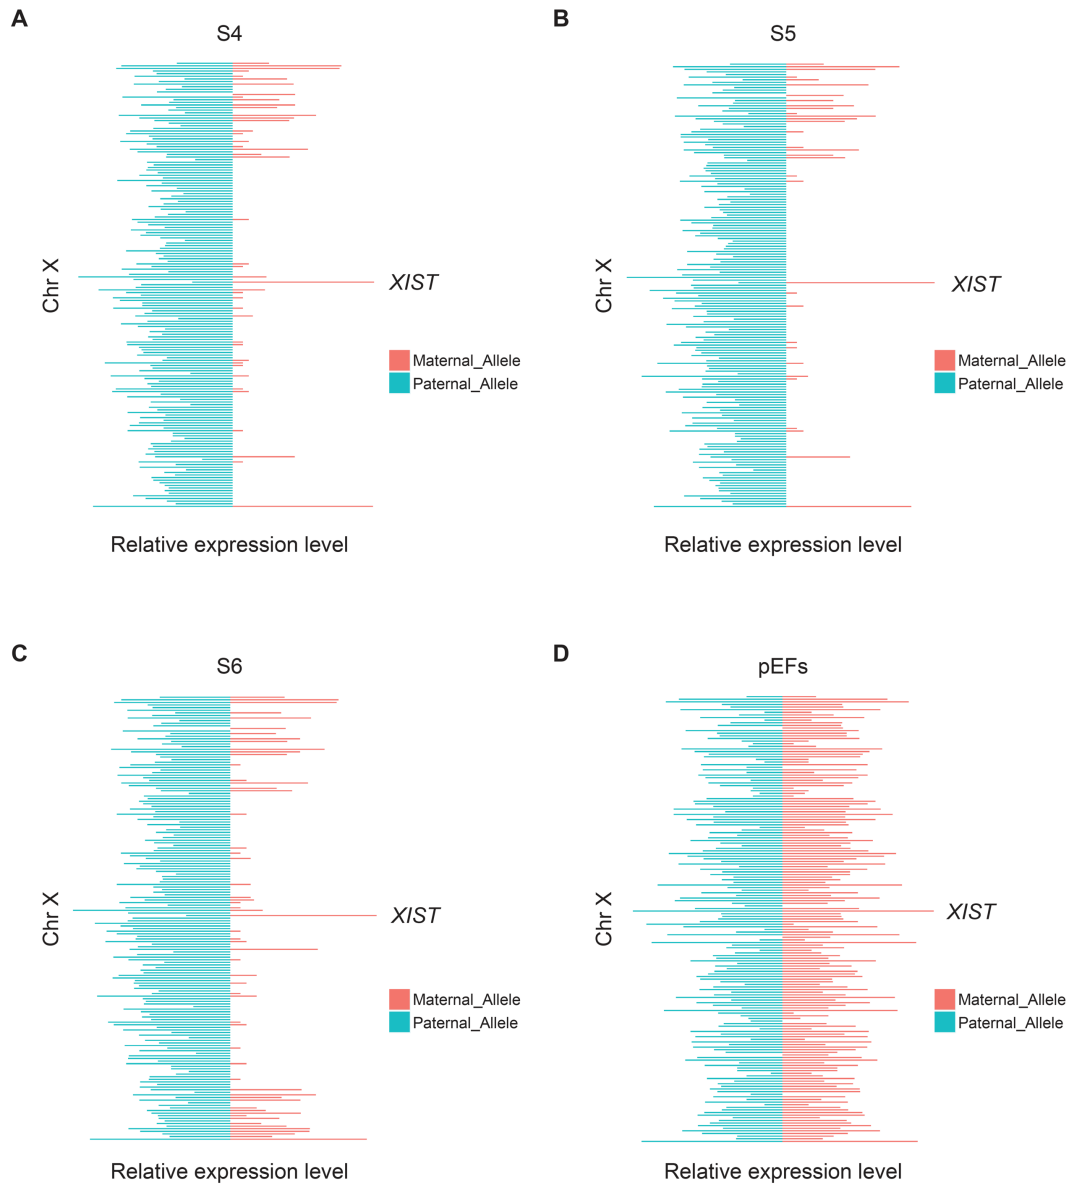

Figure S2 The allelic expression of X-linked genes in three clonal cell lines and porcine embryonic fibroblasts (S4, S5, and S6). All three clonal cell lines showed non-random maternal X inactivation. Most of X-linked genes detected are subject to X inactivation

**Figure S3**

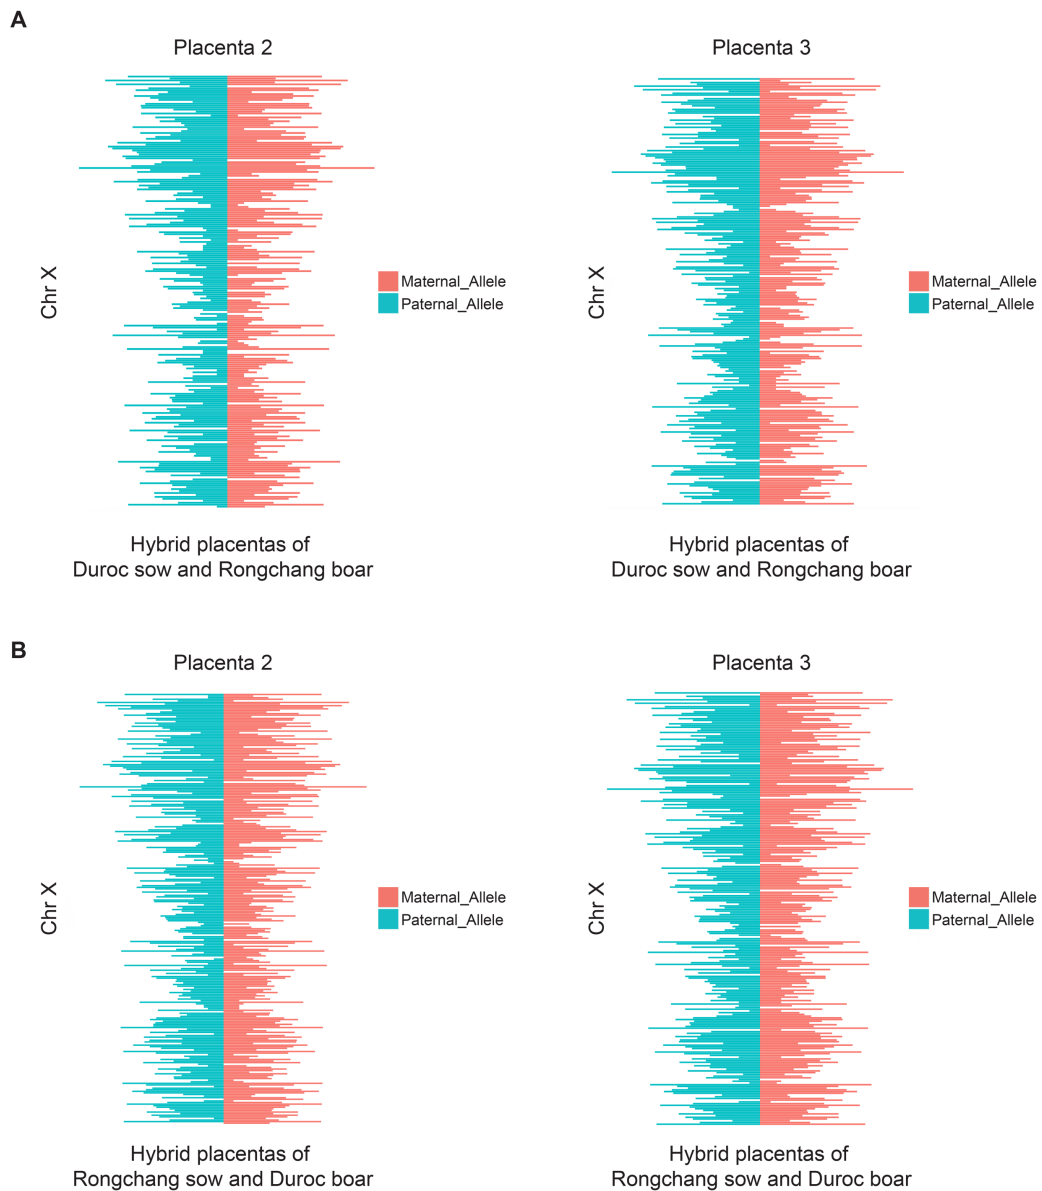

Figure S3 Biallelic expression of X-linked genes in two other hybrid placentas. Transcriptome-wide distribution of allele-specific expression in E20 hybrid placentas for X-linked genes.

(A) RNA-seq data analysis of two other E20 female hybrid placentas of Duroc sow and Rongchang boar.

(B) RNA-seq data analysis of two other E20 female hybrid placentas of Rongchang sow and Duroc boar.

The expression ratios of maternal and paternal X chromosome for X-linked genes are nearly 1:1.

**Figure S4**

1183 GCAGCATTGCTTAGCATGGCTCTCTGCTTTGTTAGAGTGTTCAAATGG**CG**GACCCACTT  
1243 TGC**CG**CAGTGTTCCAGTGG**CG**GGAAGCCACATTATGGGTGTCTTTGTTCTAG**CG**TGCAGC  
1303 ATGG**CG**GTGGAAATATTCTGTTACATAGCAAAAGATGG**CG**GCTCAAGTACTTGCC**CG**CAAT  
1363 **CG**AAAACATGG**CG**GGCCTTTGTCTTTGC**CG**TGTGCATTTCTGACAAATTTTGCC**CG**CAGG  
1423 GACAATATGGCTGACCTTGTCTGTGGATAGCATGGCAGTCTGTCA**CG**TGGA**CG**TCATGG  
1483 CAGGGGTGTTTGAC**CG**TTACATTCTTGG**CG**GGCTTTGCACCAGGAGGGCCTGC**CG**CATTG  
1543 TTCAAGATGG**CG**GGCTTTGCC**CG**GAAAAAGTGCAGGAGGGATTGGCAG**CG**TTGGATTGCC  
1603 GCC**CG**ACACATCCAATCAGAAAGGTGGTGAATTGGTCACAGACAGTTAGTGGAGGATG  
1663 GAATTAGT**CG**GAGTTAGCATAGCACCT**CG**CTAC**CG**TCTCTATTTCAGCCAGTCAGCAC**CG**G  
1723 CCA**CG**TTTGTACTACTCCAGTGGGTG

Figure S4 Prediction of DMR in porcine *XIST*. Bases in red indicates a CpG; underlined bases are Zfp57-binding sites.

**Figure S5**

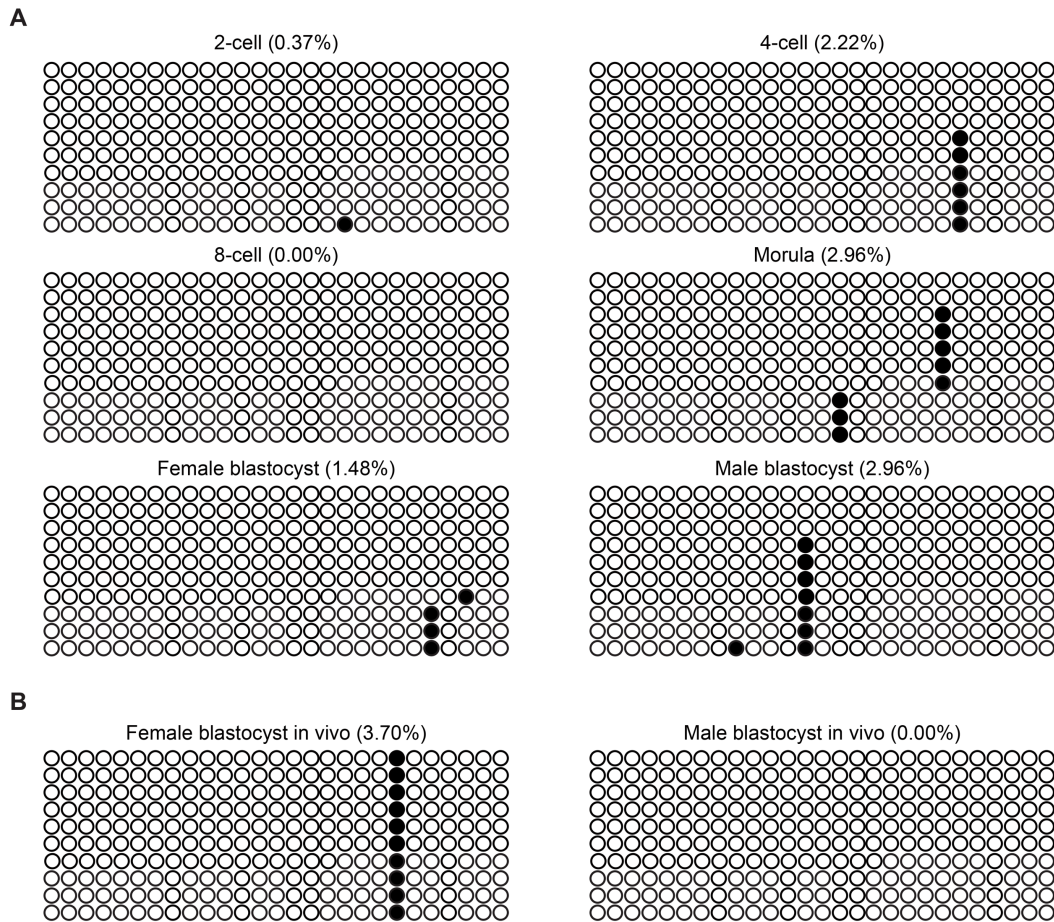

Figure S5 *XIST* DMR methylation in early embryos.

(A) *XIST* DMR methylation in ICSI embryos at different stages. (B) *XIST* DMR methylation in E7 blastocysts *in vivo*. Each circle represents a CpG dinucleotides. The methylation level (%) was based on the methylated CpGs/all examined CpGs; open circles represent unmethylation and filled circles represent methylation.

Table S1. List of primers used in this study.

| primer        | sequence                                         |                                                             |
|---------------|--------------------------------------------------|-------------------------------------------------------------|
| hXIST-1F/1R   | ctaggtgtgtcaggaggacc<br>tgtggtacttcaaagggaat     | Amplification of<br>homologous regions in<br>porcine cDNA   |
| hXIST-2F/2R   | gcctaaagcaccacactgaa<br>tgcggaacttcttagagctg     |                                                             |
| hXIST-3F/3R   | tcccttttgagaatctggat<br>tactaactgtgaaggcaa       |                                                             |
| hXIST-4F/4R   | tgatccttaggtggagatgg<br>gccccaaatactcaaaggatga   |                                                             |
| gXIST-1F/1R   | ctcctaataatttcttgaca<br>ggcaggagattgagatgatgag   |                                                             |
| gXIST-2F/2R   | ctgcctctagcattgctgac<br>cgcatctaactatccaagtacc   | Amplification of<br>overlapped regions in<br>porcine genome |
| gXIST-3F/3R   | ctaggtgtgtcaggaggacc<br>gacagcagtgcaattaagtcc    |                                                             |
| gXIST-4F/4R   | aatgggctttattgcagctac<br>ggcatgaaaaggagttaatg    |                                                             |
| gXIST-5F/5R   | ccatccccaactaactctctt<br>tcccaagtacctctacagtca   |                                                             |
| gXIST-6F/6R   | gatgggcttaaatacaactact<br>aatcacttaggaggagatggga |                                                             |
| gXIST-7F/7R   | caagggactggttaagtatgctt<br>tgaggcctaagttagatcaca |                                                             |
| gXIST-8F/8R   | catccctttctgcttcttggtg<br>tgtggtacttcaaagggaat   |                                                             |
| gXIST-9F/9R   | gccttgcttgggactgttac<br>gcagctatctcactctgaaa     |                                                             |
| gXIST-10F/10R | tgcggtctgtgtctctgtt<br>caggacaggcacagagaag       |                                                             |
| gXIST-11F/11R | gccagggactgtgttctgaa<br>ccagggaacatcagataaggat   |                                                             |
| gXIST-12F/12R | ctggcatacatttctgctgaat<br>ccaaggctcagagattctatgt |                                                             |
| AUAP          | ggccacgcgtcgactagtac                             | Primers used for 5 ' RACE                                   |
| 5RACE-856R    | gtaggtccactcacaca                                |                                                             |
| 5RACE-549R    | gccaaggggttgagaaagaggg                           |                                                             |
| 5RACE-773R    | aaccaacacttttccatccatac                          |                                                             |

|                   |                                                      |                                       |
|-------------------|------------------------------------------------------|---------------------------------------|
| Not I-dT          | aactggaagaattcgcggccgcaggaatttttttttttttt            |                                       |
| 3-P1              | aactggaagaattcgcggccgcag                             |                                       |
| 3RACE 31171F      | tgcgcttgctccttccttaacaat                             | Primers used for 3 ' RACE             |
| 3RACE 31324F      | caagccacaactggtttgaaaca                              |                                       |
| 3RACE 31074F      | ggggcaaggcttagttcctcacta                             |                                       |
| XIST-SNP-F/R      | tggactggagttggatgg<br>gtctctcaagtggagtgg             |                                       |
| XISTouter-SNP-F/R | tatgccagaccatgctgtga<br>gaggaaaagagaggactgaaat       |                                       |
| G6PD-F/R          | tgaggtttgccaacaggatc<br>tcccatcgctcgttctcca          | Amplification of X-linked genes       |
| HPRT1-F/R         | cagcgtcgtgattagtgatg<br>ttgcattgtttgccagt            |                                       |
| ZBTB33-F/R        | ggtaacgatccaccacatac<br>agtatcaacattacagtattggg      |                                       |
| SY-F/R            | caggaggatcgctgcaactggac<br>cttaatggctaatacagggaacaac | Primers used for sex determination    |
| SX-F/R            | aagggtgaaggctgaagt<br>gcctccttctcctcagcaga           |                                       |
| XISTDMR1F/1R      | aatggtgattttgattttgt<br>acatccttaaaaaaacctta         | Primers used for XIST DMR methylation |
| XISTDMR2F/2R      | gtagtattgtttagtaggt<br>accactaaaaataatacaaac         |                                       |

Table S2. Detail information of X-linked genes containing SNP between Rongchang and Duroc alleles.

| X-linked gene | Accession Number | SNP position | Duroc | Rongchang |
|---------------|------------------|--------------|-------|-----------|
| G6PD          | XM_003360515     | 1119         | T     | G         |
| HPRT1         | NM_001032376     | 397          | A     | C         |
| ZBTB33        | XM_003135334     | 4910         | T     | C         |



Table S3. Escape genes and inactive genes from inactive X in clonal cell lines

| Genes escaped from inactive X |                       | Genes subject to inactive X |         |          |
|-------------------------------|-----------------------|-----------------------------|---------|----------|
| 0.5≤allelic ratio≤1           | 0.1<allelic ratio<0.5 | allelic ratio ≤0.1          |         |          |
| ARHGAP6                       | CHM                   | ABCB7                       | HTATSF1 | RAB9A    |
| GEMIN8                        | DDX3X                 | ABCD1                       | HUWE1   | RBM10    |
| KDM6A                         | FAM3A                 | AFF2                        | IL13RA1 | RNF113A  |
| MXRA5                         | FUNDC1                | AIFM1                       | IQSEC2  | RP2      |
| TBL1Y                         | GPR143                | AMOT                        | IRAK1   | SEPT6    |
| TXLNG                         | IDH3G                 | APOOL                       | KCND1   | SLC25A43 |
| ZRSR2                         | IKBKG                 | ARAF                        | LAMP2   | SLC35A2  |
|                               | LDOC1                 | ARHGEF6                     | LONRF3  | SLC38A5  |
|                               | MAP3K15               | ARMCX2                      | MAGED1  | SLC9A6   |
|                               | MTMR1                 | ARMCX3                      | MAGED4B | SMC1A    |
|                               | PDHA1                 | ARMCX6                      | MAGIX   | SMS      |
|                               | PRPS2                 | ATG4A                       | MAGT1   | SNX12    |
|                               | SH3KBP1               | ATP6AP2                     | MECP2   | SRPX     |
|                               | STS                   | ATP7A                       | MED12   | SRPX2    |
|                               | SYAP1                 | BCOR                        | MED14   | TAF9B    |
|                               |                       | CASK                        | MORF4L2 | TBC1D25  |
|                               |                       | CCDC160                     | MOSPD1  | TCEAL2   |
|                               |                       | CCDC22                      | MPP1    | TCEAL8   |
|                               |                       | CD99L2                      | MSL3    | TCEAL9   |
|                               |                       | CH242-123K13.1              | MSN     | TCEANC   |
|                               |                       | CHRD1                       | NDUFA1  | TFE3     |
|                               |                       | CLCN4                       | NKAP    | TIMM8A   |
|                               |                       | COX7B                       | NKRF    | TIMP1    |
|                               |                       | CSTF2                       | NSDHL   | TMEM47   |
|                               |                       | CTPS2                       | NXT2    | TREX2    |
|                               |                       | CXorf38                     | OGT     | TRMT2B   |
|                               |                       | CXorf56                     | PBDC1   | TSPAN6   |
|                               |                       | DKC1                        | PDK3    | TSPYL2   |
|                               |                       | DYNLT3                      | PGK1    | TSR2     |
|                               |                       | EGFL6                       | PGRMC1  | UBA1     |
|                               |                       | ELK1                        | PHKA2   | UPRT     |
|                               |                       | FAM155B                     | PIN4    | USP11    |
|                               |                       | FAM199X                     | PIR     | WDR45    |
|                               |                       | FOXO4                       | PJA1    | WWC3     |
|                               |                       | G6PD                        | PLS3    | XPNPEP2  |
|                               |                       | GPC4                        | PLXNA3  | ZDHHC9   |
|                               |                       | GPR173                      | PORCN   | ZMYM3    |

|  |  |          |          |        |
|--|--|----------|----------|--------|
|  |  | GPRASP2  | PPEF1    | ZNF275 |
|  |  | HCCS     | PRICKLE3 | ZNF674 |
|  |  | HDAC6    | PRPS1    | ZNF75D |
|  |  | HSD17B10 | PRRG1    |        |
